# Supplementary material for: Self-sacrifice Te template synthesis of new phase PbmSb2nTem+3n nanorods via Pb2+/Sb3+ synergistic effect
Source: Royal Society of Chemistry journal article supplement (doi:10.1039/c5ra22381d), 2015-01-01
Supplement: c5ra22381d1.pdf [file c5ra22381d1.pdf]

## Electronic Supplementary Information

### Self-sacrifice Te Template Synthesis of New Phase $\text{Pb}_m\text{Sb}_{2n}\text{Te}_{m+3n}$ Nanorods via $\text{Pb}^{2+}/\text{Sb}^{3+}$ Synergistic Effect

Ziming Su<sup>1,2</sup>, Qun Wang<sup>1,2\*</sup>, Jianhuan Li<sup>2</sup>, Guangjun Zhang<sup>1\*</sup>

<sup>1</sup>State Key Laboratory of Advanced Welding and Joining, and <sup>2</sup>Department of Chemistry, Harbin Institute of Technology, 92 West Dazhi Street, Harbin, 150001, China.

E-mail: wangqun5992@hit.edu.cn;

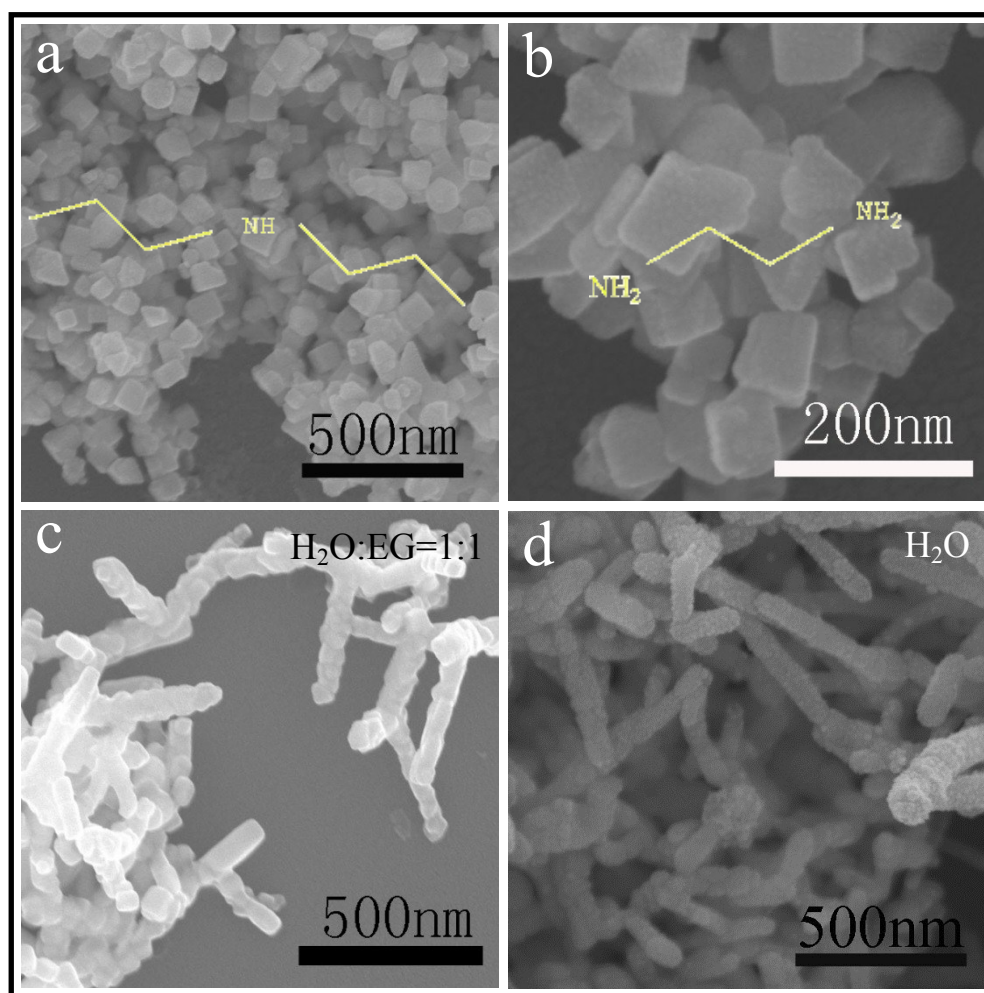

Fig. S1

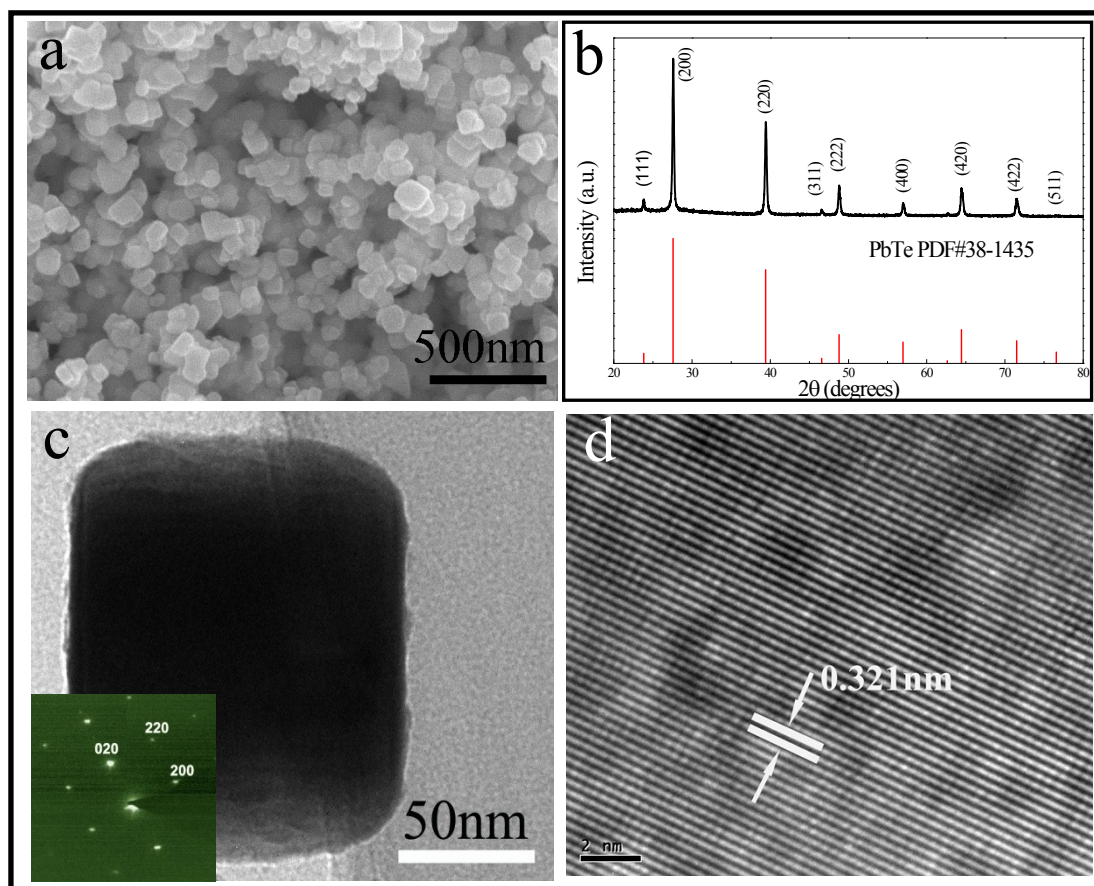

Fig. S2
