# Supplementary material for: Self-sacrifice Te template synthesis of new phase PbmSb2nTem+3n nanorods via Pb2+/Sb3+ synergistic effect
Source: Royal Society of Chemistry journal article supplement (doi:10.1039/c5ra22381d), 2015-01-01
Supplement: c5ra22381d2.pdf [file c5ra22381d2.pdf]

**Fig. S1** SEM images of as-prepared samples prepared using different solvent in the volume ratio:  
(a) EG: Dipropylamine =5:5; (b) EG:EA=5:5; (c) EG:H<sub>2</sub>O = 5:5; (d) pure water.

**Fig. S2** (a) SEM image; (b) XRD pattern; (c) TEM; (d) HRTEM image of sample obtained by the one-step method.
